# Supplementary material for: Forecasting Clinical Dose–Response From Preclinical Studies in Tuberculosis Research: Translational Predictions With Rifampicin
Source: PubMed Central journal article supplement — Clin Pharmacol Ther. 2018 Jun 19;104(6):1208–18. doi: 10.1002/cpt.1102 (PMC6282494; doi:10.1002/cpt.1102), 2018-06-19

Figure S4: Sensitivity analysis of the translational Multistate Tuberculosis Pharmacometric (MTP) model and prediction of clinical early bactericidal activity (EBA); a) exclusion of the effect compartment, i.e. direct link of PK and PD; b) no minimum inhibitory concentration (MIC) scaling term, i.e. assuming H37Rv susceptibility for all clinical *M. tuberculosis* strains. For a detailed figure legend, refer to Figure 4.

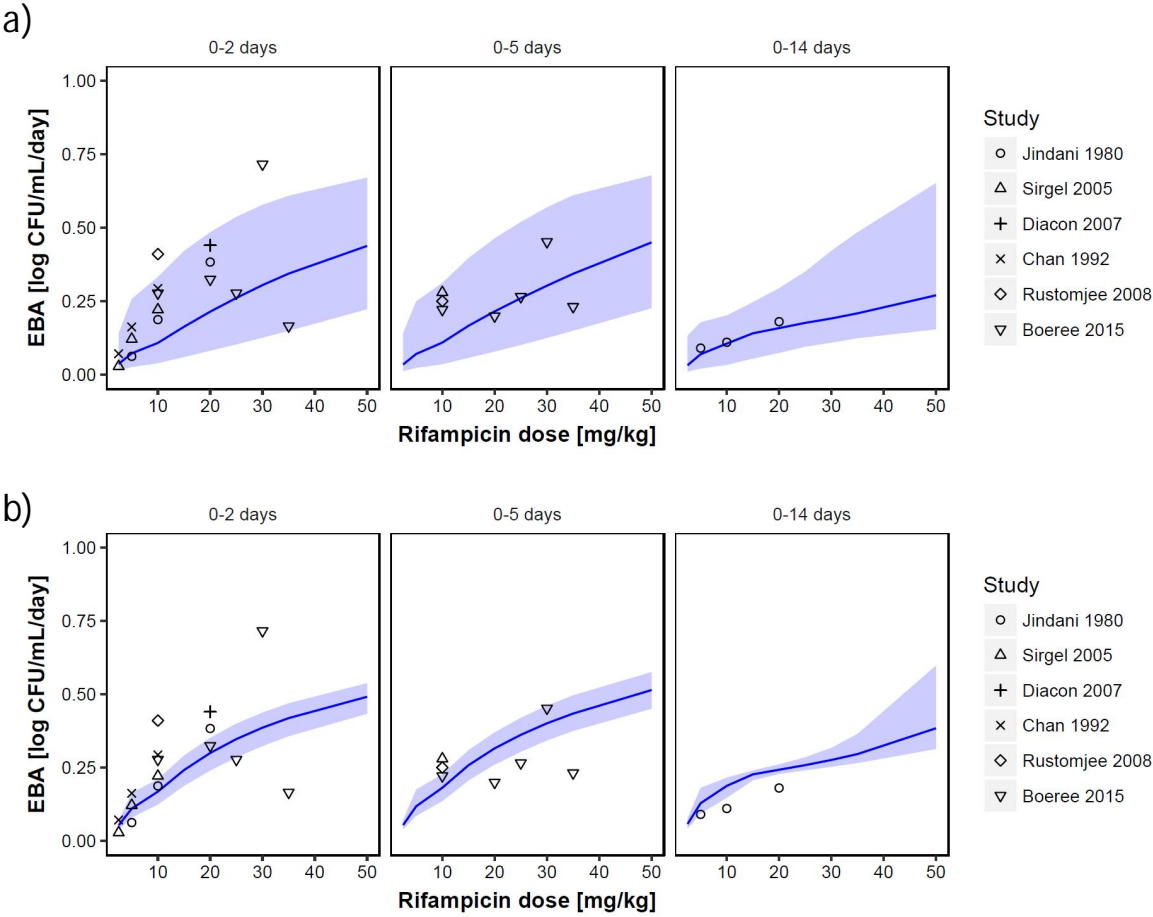

Supplement: CPT-104-1208-s004.pdf [file CPT-104-1208-s004.pdf]
