# Supplementary material for: Forecasting Clinical Dose–Response From Preclinical Studies in Tuberculosis Research: Translational Predictions With Rifampicin
Source: PubMed Central journal article supplement — Clin Pharmacol Ther. 2018 Jun 19;104(6):1208–18. doi: 10.1002/cpt.1102 (PMC6282494; doi:10.1002/cpt.1102), 2018-06-19

Figure S8: Sensitivity analysis of the translational Multistate Tuberculosis Pharmacometric (MTP) model and prediction of clinical early bactericidal activity (EBA); assumption of 30% variability of  $R_{ELF/plasma}$  instead of using the population estimate. For a detailed figure legend, refer to Figure 3.

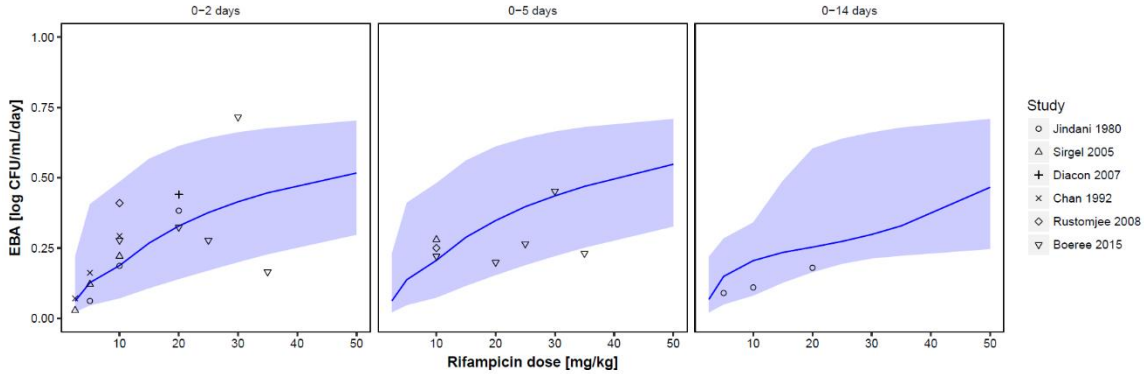

Supplement: CPT-104-1208-s008.pdf [file CPT-104-1208-s008.pdf]
