# Supplementary material for: Forecasting Clinical Dose–Response From Preclinical Studies in Tuberculosis Research: Translational Predictions With Rifampicin
Source: PubMed Central journal article supplement — Clin Pharmacol Ther. 2018 Jun 19;104(6):1208–18. doi: 10.1002/cpt.1102 (PMC6282494; doi:10.1002/cpt.1102), 2018-06-19

Figure S9: Minimum inhibitory concentration (MIC) distribution for rifampicin of a) H37Ra, b) H37Rv and c) clinical mycobacterium tuberculosis isolates (EUCAST).

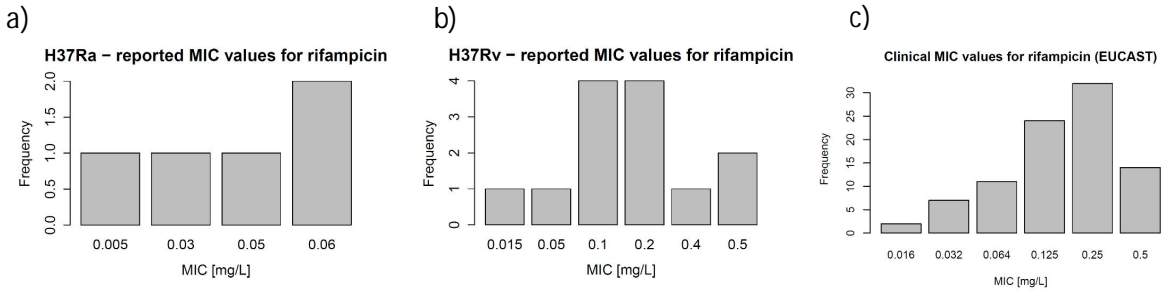

Supplement: CPT-104-1208-s009.pdf [file CPT-104-1208-s009.pdf]
